# Supplementary material for: Longitudinal trajectories of memory among middle-aged and older people with hearing loss: the influence of cochlear implant use on cognitive functioning
Source: PubMed Central journal article supplement (PMC10537213; doi:10.3389/fnagi.2023.1220184), 2023-09-14
Supplement: Data_Sheet_1.pdf [file Data_Sheet_1.pdf]

**Supplementary Table 1:** Multilevel growth models predicting memory in the combined data with interaction effects for “sample” (coded as: 0 = secondary data; 1 = primary data; n = 8,152; n = 28,895 observations)

| Variables              | Delayed recall | Delayed recall | Immediate recall | Immediate recall |
|------------------------|----------------|----------------|------------------|------------------|
| Age                    | -0.147***      | -0.148***      | -0.107***        | -0.107***        |
| Female                 | 1.487***       | 1.486***       | 1.338***         | 1.337***         |
| Education              | 1.447**        | 1.447**        | 1.457***         | 1.457***         |
| Mean Arterial Pressure | -0.015         | -0.015         | -0.008           | -0.009           |
| Alcohol                | 0.779          | 0.785          | 0.696            | 0.701            |
| Smoking                | -0.898         | -0.915         | -0.835           | -0.835           |
| Obese                  | -0.577         | -0.593         | -0.58            | -0.59            |
| Time                   | -0.156*        | -0.245         | -0.11            | -0.11            |
| Sample                 | -672.257***    | -690.363***    | -533.89***       | -549.58***       |
| Sample × wave          | 27.854***      | 86.638***      | 19.135***        | 70.040***        |
| wave × wave            |                | 0.03           |                  | 0.01             |
| Sample × wave × wave   |                | -20.977***     |                  | -18.164***       |
| Intercept              | 14.791***      | 14.955***      | 12.728***        | 12.851***        |

Notes. \*\*\*  $p < .001$ , \*\*  $p < .01$ , \*  $p < .05$

**Supplementary Table 2:** Multilevel growth models predicting memory in the secondary data for individuals who heard 0 or 1 tones in the best hearing ear (n = 99 individuals; n = 340 observations)

| Variables              | Delayed recall               | Immediate recall            |
|------------------------|------------------------------|-----------------------------|
| Age                    | -0.072***<br>(0.02)          | -0.068***<br>(0.01)         |
| Female                 | 0.348<br>(0.31)              | 0.138<br>(0.27)             |
| Education              | 0.753<br>(0.42)              | 0.678<br>(0.37)             |
| Mean Arterial Pressure | -0.02<br>(0.01)              | 0.003<br>(0.01)             |
| Alcohol                | 0.385<br>(0.32)              | 0.561*<br>(0.27)            |
| Smoking                | -0.11<br>(0.58)              | -0.322<br>(0.51)            |
| Obese                  | 0.425<br>(0.45)              | 0.233<br>(0.39)             |
| Time                   | -0.283***<br>(0.08)          | -0.169*<br>(0.07)           |
| Intercept              | 9.912***<br>(1.85)<br>(0.06) | 8.917***<br>(1.6)<br>(0.06) |

Notes: Standard errors are in parentheses. \*\*\*  $p < .001$ , \*\*  $p < .01$ , \*  $p < .05$
